# Supplementary material for: Potentiation of the ibuprofen antihyperalgesic effect using inorganically functionalized diatomite
Source: Royal Society of Chemistry journal article supplement (doi:10.1039/c8tb01376d), 2018-01-01
Supplement: c8tb01376d1.pdf [file c8tb01376d1.pdf]

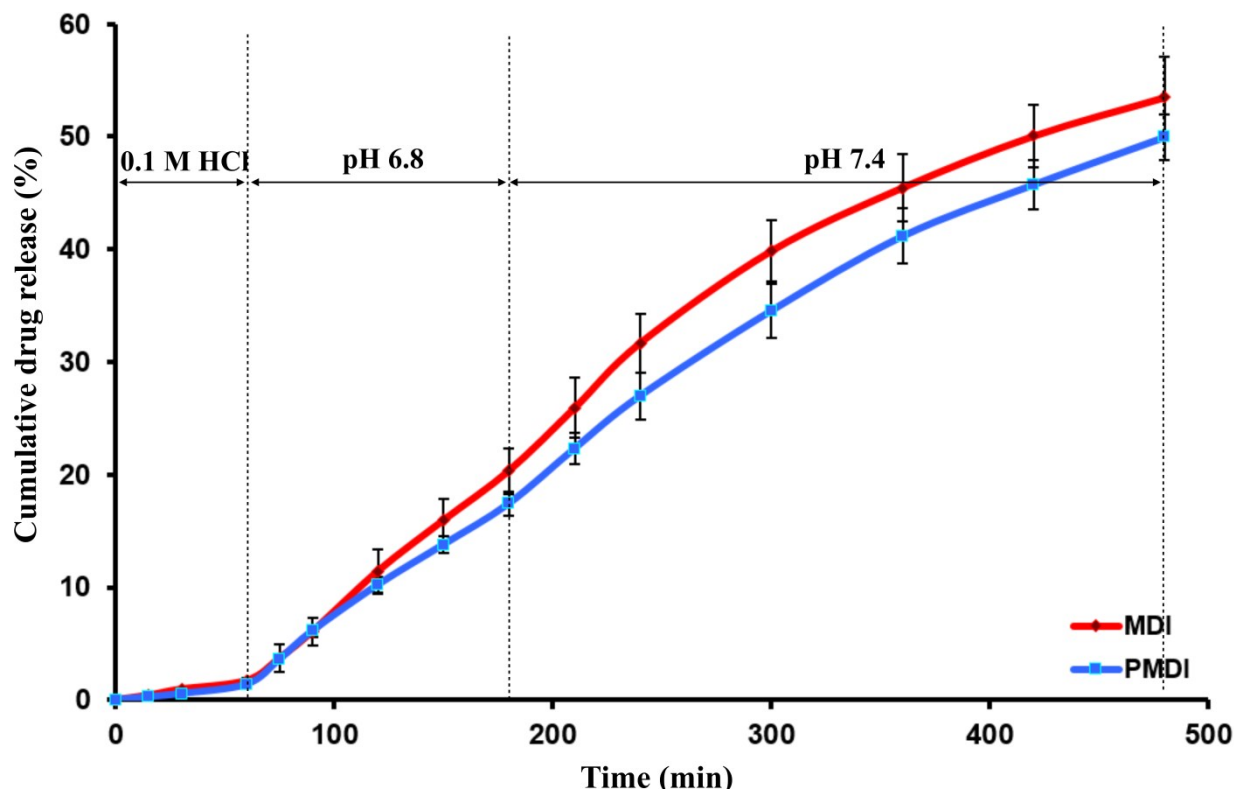

Figure S1. *In vitro* drug release profiles from MDI and PMDI comprimates in conditions mimicking gastrointestinal tract: 1 h in 0.1 M HCl, 2 h in phosphate buffer pH 6.8 and 5 h in phosphate buffer pH 7.4, sequentially
